# Leukemia Inhibitory Factor Can Substitute for Nidatory Estrogen and Is Essential to Inducing a Receptive Uterus for Implantation But Is Not Essential for Subsequent Embryogenesis\*

J. R. CHEN†, JR-GANG CHENG, T. SHATZER, L. SEWELL, L. HERNANDEZ, AND C. L. STEWART

*Cancer and Developmental Biology Laboratory (J.R.C., J.-G.C., L.H., C.L.S.), ABL-Basic Research Program, NCI-Frederick Cancer Research and Development Center, Frederick, Maryland 21702; Science Applications International Corporation (T.S., L.S.), NCI-Frederick Cancer Research and Development Center, Frederick, Maryland 21702-1201*

## ABSTRACT

A stage critical in mammalian development is embryo implantation. At this point, the blastocyst establishes a close interaction with the uterine tissues, a step necessary for its continued embryonic development. In many mammalian species, including man, uterine expression of the cytokine, leukemia inhibitory factor (LIF) is coincident with the onset of implantation and in mice LIF is essential to this process. The reasons for implantation failure have not been established. Here we show in LIF-deficient mice that up to the onset of implantation, changes in uterine cell proliferation, hormone levels, blastocyst localization, as well as expression of lactoferrin and Muc-1, do not differ from wild-types. However, the uterus fails to respond to

the presence of embryos or to artificial stimuli by decidualizing. In mice, implantation and decidualization are induced by nidatory estrogen. We show that uterine expression of LIF is up-regulated by estrogen and LIF can replace nidatory estrogen at inducing both implantation and decidualization in ovariectomized mice. Implantation of LIF-deficient embryos in the LIF-deficient females, with normal development to term is rescued by ip injection of LIF. Transient expression of LIF on D4 of pregnancy is therefore only required to induce a state of receptivity in the uterus permitting embryo implantation and decidualization. LIF is neither required by the embryo for development nor for the maintenance of pregnancy. (*Endocrinology* 141: 4365–4372, 2000)

IN MAMMALS, embryo implantation is an essential step in their reproduction. At this stage, the autonomously developing preimplantation embryo enters the uterine lumen and as a blastocyst, establishes a physically closer interaction with the uterine tissues. The extent of this interaction varies between species. In the human and in rodents, the trophoblast invades the uterine tissues and even replaces the capillary endothelium in the uterine blood vessels. In others such as the pig, the embryonic trophoblast remains juxtaposed to the uterine epithelium (1). In all species, the establishment of close physical contact between the embryo and uterine tissues is essential for the continuation of embryonic development.

In preparation for implantation, the uterine tissues undergo distinct cycles of cell proliferation and differentiation. These are induced by the ovarian steroid hormones estrogen ( $E_2$ ) and progesterone ( $P_4$ ) (2–5). Some of these changes are either directly mediated by the action of the hormones on the

cells or are indirectly regulated through the induction of locally produced growth factors and cytokines, such as epidermal growth factor (EGF) (6, 7), and insulin-like growth factor 1 (IGF-1) (8, 9).

In conjunction with these cycles, the uterus undergoes a change in its receptivity. In mice, blastocysts cannot implant during the first 3 days following mating. Late on the fourth day until early on the fifth day, for about 18 h the uterus becomes receptive (10). At the onset of this period, the blastocysts are in close contact (apposition) with the luminal epithelium. With the start of implantation, the luminal epithelium adjacent to the mural trophoctoderm undergoes apoptosis and the trophoblast cells migrate into the underlying endometrial stroma (11). The stroma responds by rapidly proliferating and differentiating to form the decidua. If implantation doesn't occur, the uterus becomes nonreceptive, refractory to implantation, and eventually re-enters the reproductive cycle.

In rodents, implantation is stimulated by a transient rise in circulating levels of  $E_2$ —the nidatory surge on the morning of the fourth day of pregnancy (12, 13). Whether  $E_2$  stimulates implantation directly or through secondary factor(s) is currently an area of much interest. One factor essential for embryo implantation is the cytokine leukemia inhibitory factor (LIF) (14). LIF is transiently expressed in the glandular epithelium of mice at ovulation and again on the fourth day of pregnancy (15, 16). In other mammalian species, including the human, LIF expression in the uterus also is up-regulated

Received June 30, 2000.

Address all correspondence and requests for reprints to: Colin L. Stewart, Laboratory of Cancer and Developmental Biology, National Cancer Institute-FCRDC, P.O. Box B, Frederick, Maryland 21702-1201. E-mail: stewartc@mail.ncicrf.gov.

\* This work was sponsored in part by the National Cancer Institute, Department of Health and Human Services, under contract with Advanced Biosciences Laboratories and Contract No. N01-C0-56000 with Science Applications International Corporation.

† Present address: Department of Pathology, Chang Gung Memorial Hospital Linkou, Kwei San, Tao Yuan, Taiwan.

around the onset of embryo implantation, suggesting that LIF may be of general significance to embryo implantation in mammals (17–19).

Female mice carrying a null mutation in the LIF gene are sterile because blastocysts do not implant. Reciprocal transfer of blastocysts between wild-type and LIF-deficient females showed that implantation failure was due to a defective maternal uterine environment rather than deficiencies in the embryo (14). The basis for the inability of the uterus to respond to blastocysts has not been established. Here, we show that in LIF-deficient female mice, up to the onset of implantation, uterine cell proliferation, hormone levels, gene expression, and embryo development does not differ from those observed in wild-type females. However, LIF-deficient uteri do not respond to some decidualizing signals. Embryo implantation in LIF deficient females can be rescued by ip injection of recombinant LIF with the embryos developing to term and surviving to adulthood. Implantation and decidualization can also be induced in hormone primed ovariectomized mice by substituting LIF for nidatory  $E_2$ , revealing that nidatory  $E_2$  is only required to induce LIF. Uterine expression of LIF, under the control of nidatory  $E_2$ , is therefore essential for inducing a fully receptive state to the uterus and is not essential for subsequent embryonic development or for the maintenance of pregnancy.

## Materials and Methods

### Mice

LIF-deficient mice were maintained from a previously established colony (14) except that LIF deficient females were maintained on a mixed (BALB/cXC57BL6) background. All wild-type mice were (C57BL6XC3H) F1s. Animal care was provided in accordance with the procedures outlined in the *Guide for the Care and Use of Laboratory Animals* (NIH Publication No. 86–23, 1985). Surgical procedures were performed under tribromoethanol (Avertin) anesthesia according to institutional guidelines. Hormonal priming of ovariectomized mice was performed according to previously established protocols (12) and were as follows; starting 14–18 days after ovariectomy for the first 3 days the mice were injected each day with 100 ng of estradiol-17 $\beta$  ( $E_2$ ) in arachis oil. Three days later, the mice received 1 injection of 5 mg of 6 $\alpha$ -methyl-17-hydroxy-progesterone acetate (Depo-Provera- $P_4$ , Pharmacia, Inc., Peapack, NJ), followed 3 days later by a single injection of 40 ng of  $E_2$ . In some instances the last injection of  $E_2$  was omitted or was substituted by ip injection of LIF or the microinjection of 3  $\mu$ l of LIF or PBS into the right uterine horn. To induce decidualization, the right uterus of the hormone primed or control mice was injected with 50  $\mu$ l of paraffin oil. The contralateral horn was used as a control. When embryos were used for implantation studies, the embryos were isolated from superovulated mice at the 8-cell stage and cultured overnight in KSOM (20) medium before their surgical transfer into the recipient uteri as blastocysts. For cell proliferation analysis, mice were injected with a single dose of BrdU of 100  $\mu$ g/g body weight 15 h after the last injection of  $E_2$ . Two hours later, the mice were killed and the uteri processed for histological and quantitative analysis. Statistical comparisons were performed using Student's two tailed *t* test or oneway ANOVA to determine whether the treatments were significant (*P* < 0.05).

### LIF production

Recombinant LIF was produced using pGeX-mLIF and was expressed as a glutathione S-transferase fusion protein in *Escherichia coli* JM109. The expression, purification, and cleavage of fusion mLIF protein was essentially performed as previously described (21). Purity was determined by inspection of silver-stained SDS-PAGE gels run in a Amersham Pharmacia Biotech. Phast gel system and the biological ac-

tivity of LIF was determined by the Coomassie Plus Protein Assay and Ba/F3 cell proliferation assay (22).

### Hormone measurement

$P_4$  levels were quantified using by RIA and performed according to the manufactures instructions (Diagnostics Systems Laboratories, Inc., Webster, TX).

### Histology

Tissues for routine histological analysis were fixed in 4% paraformaldehyde, embedded, sectioned at 6  $\mu$ m and stained using H and E. Fixation for the BrdU labeled uteri was in 70% ethanol. The tissues were then processed and stained using an antibody to BrdU according to the manufacturer's instructions (DAKO Corp.). Uterine cells undergoing DNA synthesis were counted within a fixed area and expressed as the percentage of the total number of cells within the area. For alkaline phosphatase staining the tissues were fixed and processed according the established procedures although the tissues were embedded and sectioned in 55 C melting point wax (23).

### Molecular analysis

Northern analysis and the measurement of LIF mRNA levels by RNase protection was performed as previously described (15) and quantified using NIH image quant software. Probes to Muc-1 and lactoferrin were generated by RT-PCR, cloned into pGEMTeasy and confirmed by sequencing. The primers for the murine Mucin-1 (Muc-1) cDNA were: forward, 5'-TCATCTCAGGACACCAGCAGTTC-3'; reverse, 5'-ACTGTGGACTACTGGAGAGCTGTTG-3' and corresponded to the region in the Muc-1 cDNA between 1358 and 1657 bp. The primers for the murine Lactoferrin cDNA were: forward, 5'-TGTGTGAACAGACAGTGGGAG-3'; reverse, 5'-TTCTGCAAGACAGTGGAGTCCTTC-3' and corresponded to the region between 1360 to 1740 bp in the cDNA.

## Results

### Uterine cell proliferation, gene expression, and $P_4$ levels in LIF-deficient mice

In the murine reproductive cycle, uterine levels of LIF rise significantly on two occasions. The first is at ovulation and the second, following mating, is on the morning of the fourth day of pregnancy (day plug  $\equiv$  day 1). Throughout the remainder of the cycle and during pregnancy LIF continues to be expressed in the uterus at basal levels (15, 16). As LIF is highly expressed at ovulation, it may be required to mediate  $E_2$ - and  $P_4$ -induced changes in uterine cell proliferation and gene expression before implantation. We compared the distribution and numbers of uterine cells undergoing proliferation in ovariectomized wild-type and LIF deficient females following injection with  $E_2$  alone or in combination with  $P_4$ . In normal mice,  $E_2$  alone induces proliferation in the glandular and luminal epithelium. When  $P_4$  is given 3 days after  $E_2$ , it suppresses epithelial proliferation, induces morphological changes in the epithelium with the cells assuming a columnar and secretory phenotype and primes the stroma for proliferation. A second injection of  $E_2$ , 3 days later, induces stromal cell proliferation with DNA replication peaking 15 h after  $E_2$  injection. A histological and quantitative comparison of the uteri following BrdU labeling revealed no statistically significant differences in the distribution and percentage of cells undergoing DNA synthesis between wild-type and LIF-deficient uteri following both hormonal regimens. This revealed that LIF expression was not essential to mediating the effects of  $E_2$  and  $P_4$  on uterine cell proliferation (Fig. 1A). Similarly, we compared the expression of

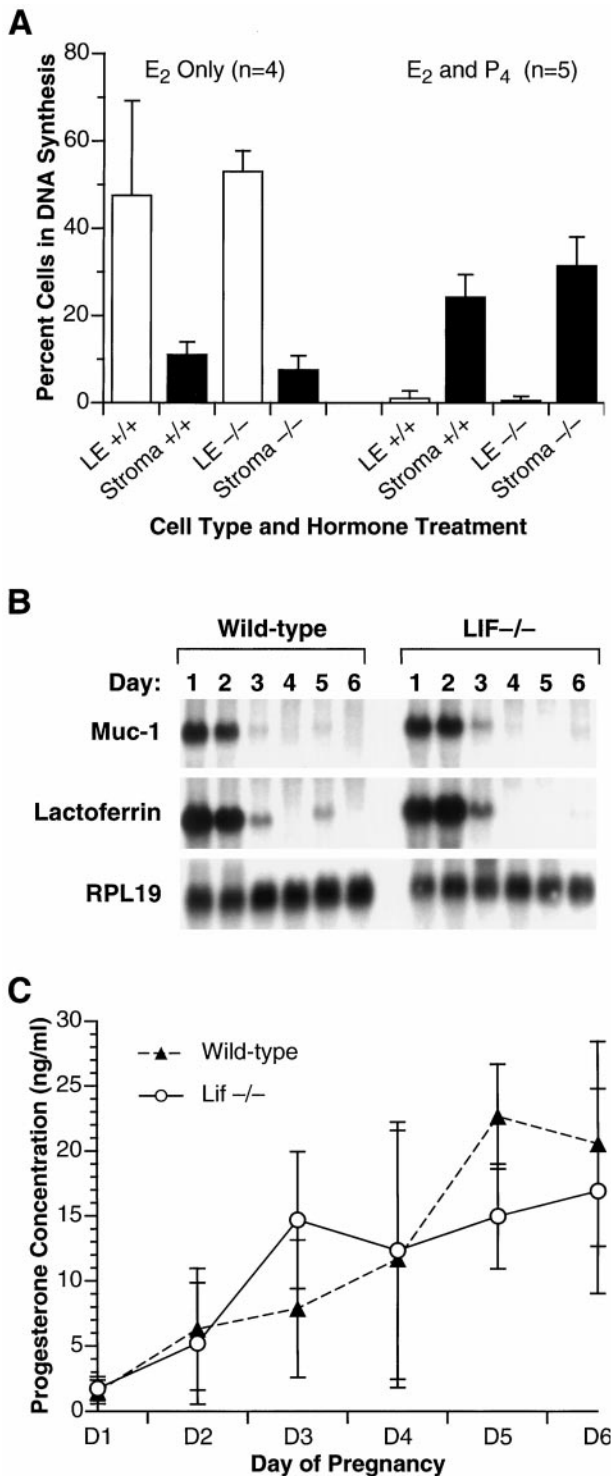

FIG. 1. A, Wild-type (+/+) and LIF-deficient (-/-) labeling indexes in the luminal epithelium (LE) and stroma following E<sub>2</sub> injection are identical. Similarly, P<sub>4</sub> injection following E<sub>2</sub> results in a shift of proliferation to the stroma in both genotypes. A comparison of the mean numbers of labeled nuclei in the epithelium and stroma of wild-type and LIF-deficient mice were compared and were found not to be statistically significant at the 95% confidence level. B, Uterine expression of lactoferrin and Muc-1 are the same in both genotypes except for low level expression of lactoferrin transcripts on D5 of pregnancy in +/+ mice. C, P<sub>4</sub> levels in both +/+ and -/- mice increase at similar rates during the first week of pregnancy.

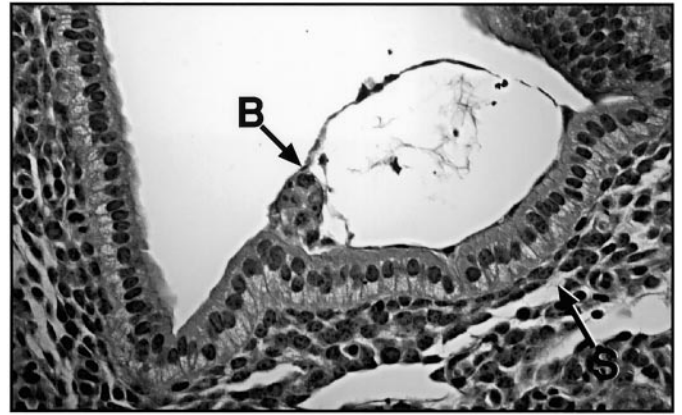

FIG. 2. A 7-day LIF<sup>-/-</sup> blastocyst (B) in apposition to the luminal epithelium in a LIF<sup>-/-</sup> uterus. The stroma (S) shows no evidence of decidualization and the luminal epithelium in contact with the blastocyst is intact and not undergoing apoptosis.

two proteins lactoferrin and Muc-1, which are expressed in the glandular and luminal epithelia and are regulated by E<sub>2</sub> and P<sub>4</sub> (24, 25). Both proteins are expressed in the epithelium during preimplantation development with their levels declining during the first 3–4 days of pregnancy. Again, we saw no detectable differences in their levels of expression in the uteri of wild-type and LIF-deficient mice apart from a weak signal on D5 in the wild-type uteri that was not seen in the LIF-deficient uteri (Fig. 1B). We also measured P<sub>4</sub> levels over the first 7 days of pregnancy following mating. Although there was substantial variation between individuals in the systemic levels of P<sub>4</sub> in both wild-type and LIF-deficient mice, P<sub>4</sub> concentrations steadily rose over the first 7 days following mating to levels previously reported, indicating that loss of LIF had no significant role in regulating P<sub>4</sub> levels (Fig. 1C). From these results, we conclude that LIF expression at ovulation is not a significant factor in mediating the changes in uterine cell proliferation, gene expression, and in the increase in P<sub>4</sub> during the first 7 days of pregnancy.

#### Preimplantation development in the LIF-deficient mice

In mice, the uterine morphology changes on the fourth day of pregnancy with the lumen's shape changing from a circular to slit-like profile. The blastocysts come to lie at the antimesometrial side of the lumen in apposition with the uterine epithelium. In normal pregnancies, blastocysts are in apposition to the luminal epithelium early on D4, with implantation starting late on day 4. By day 7, the embryo has formed an egg cylinder with the trophoblast invading the endometrium, which has also differentiated to form the decidua, making it impossible to flush embryos from the uterus. Previously, we had shown that blastocysts from LIF-deficient females could be readily flushed from the uteri of D7 pregnant mice (14). This indicated that the blastocysts were not tightly attached to the uteri and had not invaded the uterus. Histological analysis of D7 uteri from pregnant LIF-deficient females mated to LIF null males resulted in the identification of 13 blastocysts in four uteri. In all instances, the blastocysts had hatched from their zonae and were located at the antimesometrial side of the lumen. Twelve of the 13 blastocysts



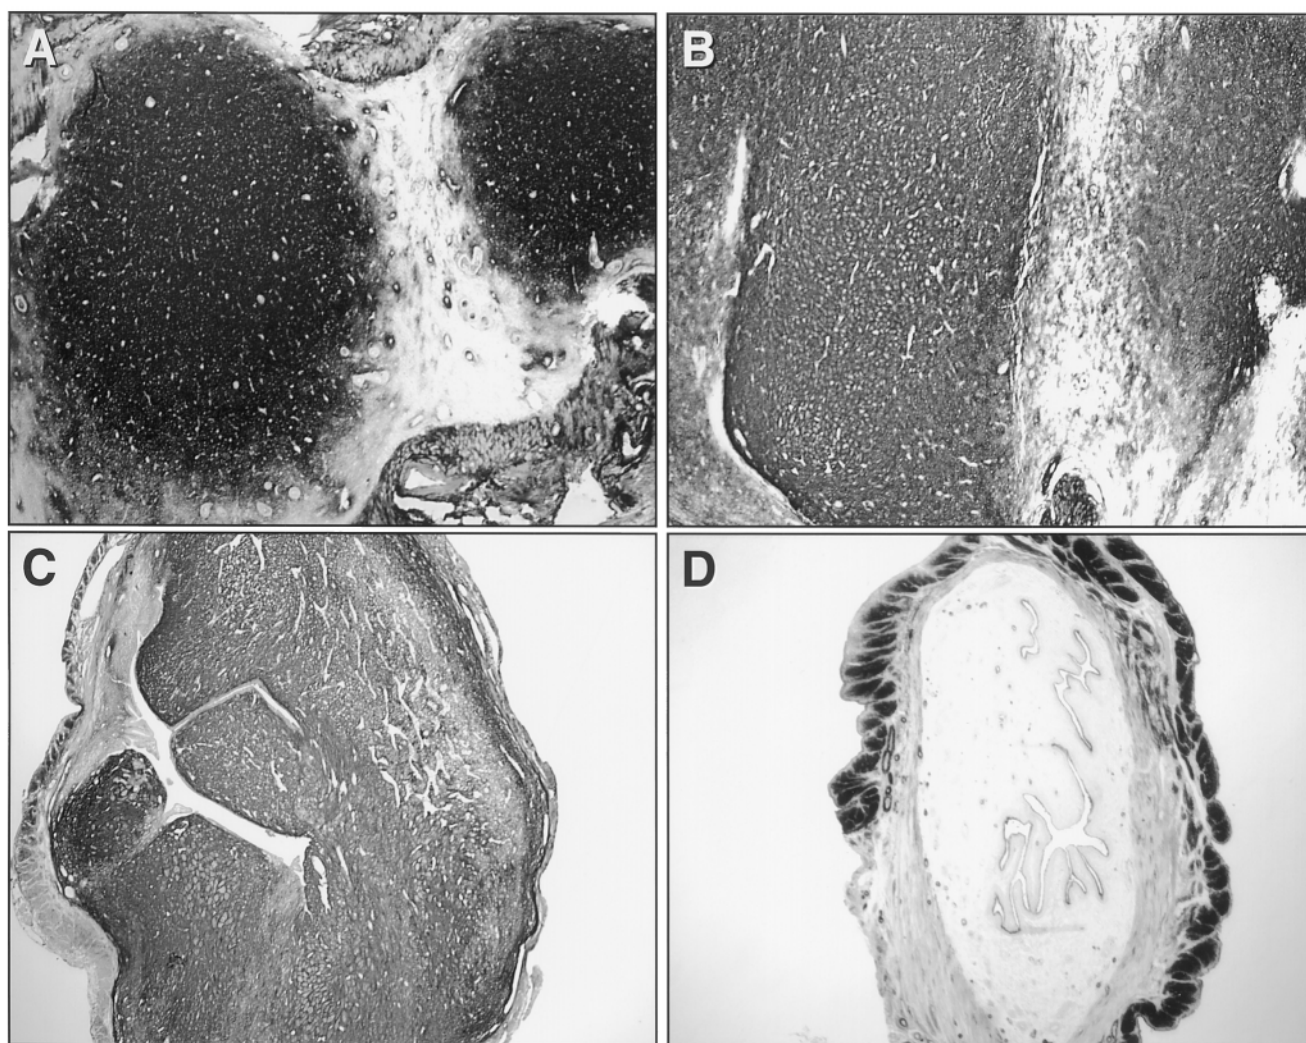

FIG. 3. A, Wild-type uteri decidualize following crushing in the absence of nidatory  $E_2$ . The black/gray staining is indicative of alkaline phosphatase activity, a marker for decidual cells (5/8 mice treated). B, Wild-type uteri decidualize following nidatory  $E_2$  and oil injection (15/17 mice treated). C, LIF $^{-/-}$  uteri partially decidualize following crushing. (5/8 mice treated). D, LIF $^{-/-}$  uteri do not decidualize following  $E_2$  and oil injection. (0/20 mice treated).

were in tight contact by their mural trophoderm with the luminal epithelium, with many of the blastocysts being surrounded by the epithelium. The epithelium juxtaposed to the embryo showed no overt indication of it separating from underlying basement membrane or undergoing apoptosis, two morphological changes associated with the onset of implantation in normal mice. Furthermore, the underlying stroma retained a fibroblastic morphology with no evidence of it decidualizing (Fig 2). Similarly, systemic injection of pregnant LIF-deficient females, on day 5 with Pontamine Blue revealed no evidence of localized uterine edema, which is one of the earliest indications of implantation starting.

#### *LIF-deficient mice fail to respond to some decidualizing stimuli*

Our preceding analysis revealed preimplantation changes in the uterus and blastocyst localization did not differ in any significant way between wild-type and LIF-deficient females. The only difference was that in the LIF-deficient mice

implantation and decidualization was absent. In receptive rodents, the uterus responds to the presence of an embryo by decidualization of the stroma. What triggers this response has been an area of considerable interest. Although the blastocyst is the normal stimulus, a variety of artificial stimuli can also induce a decidual response following appropriate hormonal priming. These stimuli have usually consisted of the injection of a small volume of oil into the lumen of hormonally primed uteri. However, more traumatic stimuli, such as crushing the  $P_4$ -treated uterus, are also effective and do not depend on  $E_2$  (26). Oil injection into twenty ovariectomized, hormonally primed with  $E_2$  and  $P_4$  and nidatory  $E_2$  LIF-deficient females, did not result in any indication that decidualization was induced, as assessed by an increase in uterine weight or the appearance of alkaline phosphatase positive stromal cells, a marker of decidualization. In wild-type uteri, decidualization was readily apparent following oil injection in 15/17 mice. However, when uteri of  $P_4$ -treated LIF deficient mice were crushed in several places using a

hemostat, decidualization was apparent in 5 out of 7 wild-type uteri and in 5 of 8 LIF deficient uteri (Fig. 3, A–D).

#### Regulation of LIF expression and substitution of nidatory $E_2$ by LIF

Up-regulation of uterine LIF expression at ovulation and implantation is coincident with increased  $E_2$  levels, suggesting that LIF expression is regulated by  $E_2$ . To directly determine that LIF could be induced by  $E_2$  we injected ovariectomized wild-type mice with 100ng of  $E_2$  and then assayed LIF mRNA expression in the uterus at various times after injection. Within 1 h, LIF levels had increased 3-fold, but were declining by 5 h and had returned to basal levels by 12 h after injection. Injection of  $P_4$  had no effect on LIF expression (Fig 4). We then sought to determine whether LIF could substitute for nidatory  $E_2$ .

Female wild-type mice mated to fertile males were ovariectomized on the afternoon of the third day of pregnancy and injected with  $P_4$ . Three days later, the mice were injected ip with varying doses of recombinant LIF and the mice examined a further 3 days later for evidence that the embryos had implanted. The results are presented in Table 1a and show that a single injection of 10  $\mu$ g was sufficient to result in embryo implantation at rates comparable to those achieved with  $E_2$ . Similar rates of implantation were also attained by giving 4 injections of LIF of 1  $\mu$ g over an 8-h period. However, six injections of LIF at 0.5  $\mu$ g were unsuccessful at inducing implantation. Injection of the mice with PBS did not result in implantation and unimplanted blastocysts showing the typical morphology of those in delay were recovered from the uteri of these females.

We then repeated these experiments by direct injection of LIF into the uterine lumen using ovariectomized wild-type females treated with  $P_4$ . Three days after  $P_4$  injection, nidatory  $E_2$  was substituted by LIF, at doses ranging from 25 ng to 1  $\mu$ g, which were injected into the right uterine horn in a 3  $\mu$ l volume followed by the transfer of 5–8 blastocysts derived from 8-cell stage embryos cultured overnight. Three days later, the mice were examined for the presence of decidual swellings, which were then dissected to determine whether they contained embryos. These results are presented in Table 1b and show that LIF at a dose as low as 25 ng when injected directly into the uterine lumen of wild-type mice was

**TABLE 1a.** Dose of LIF by ip injection required to induce embryo implantation in ovariectomized +/+ mice without nidatory  $E_2$

| Treatment<br>( $\mu$ g/mouse $\times$ injections) | Nos. Mice<br>ovxd | Nos. Mice<br>with Deciduae | Mean Nos.<br>Implanted Embryos |
|---------------------------------------------------|-------------------|----------------------------|--------------------------------|
| $E_2$ (25 ng)                                     | 8                 | 6                          | 7.8                            |
| LIF 10 $\mu$ g $\times$ 1                         | 8                 | 7                          | 8.6                            |
| LIF 1 $\mu$ g $\times$ 4                          | 10                | 8                          | 6.4                            |
| LIF 0.5 $\mu$ g $\times$ 6                        | 6                 | 0                          | 0                              |
|                                                   |                   |                            | (25 blastocysts recovered)     |
| PBS/Saline                                        | 5                 | 5                          | 0                              |
|                                                   |                   |                            | (27 blastocysts recovered)     |

**TABLE 1b.** Dose of LIF injected intraluminally to replace nidatory  $E_2$  and induce embryo implantation in ovariectomized wild-type and LIF  $-/-$  mice

| Nos. of Mice | LIF Dose $\mu$ g | Nos. Embryos Transferred | Nos. Mice pregnant (Embryos Implanted) | Nos. Unimplanted Embryos Recovered |
|--------------|------------------|--------------------------|----------------------------------------|------------------------------------|
| 6            | 1                | 42                       | 6 (24)                                 | —                                  |
| 6            | 0.1              | 36                       | 4 (14)                                 | —                                  |
| 6            | 0.05             | 42                       | 5 (6)                                  | —                                  |
| 4            | 0.025            | 32                       | 1 (5)                                  | 9                                  |
| 4            | 0                | 26                       | 0                                      | 10                                 |

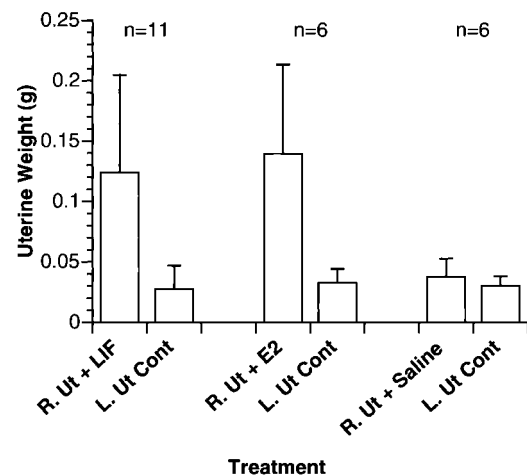

**FIG. 5.** Comparison between LIF injection and  $E_2$  at the extent of decidualization induced following either treatment. Uterine wet weights were measured 3 days after injection of either factor. There was no statistically significant difference between either treatment ( $P \geq 0.7$ ).

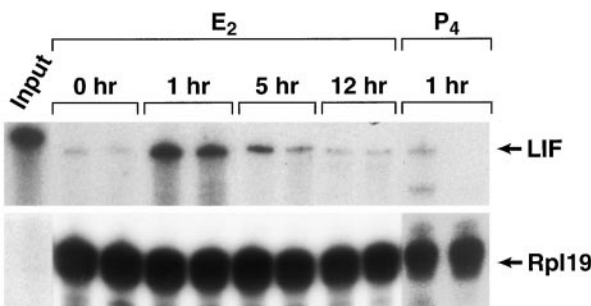

**FIG. 4.**  $E_2$  induction of LIF. Ovariectomized mice were injected with 100 ng  $E_2$  and total RNA isolated at different times after injection and measured by RNase protection assay. LIF transcripts rise rapidly within 1 h after  $E_2$  and then decline to basal levels by 12 h.  $P_4$  had no effect on LIF expression. Rpl19 was used as a loading control.

able to induce blastocyst implantation with subsequent normal embryogenesis. Controls, in which only PBS was injected into the lumen, did not result in blastocyst implantation and unimplanted blastocysts were recovered following flushing of the uteri. We also compared the extent to which decidualization could be induced by either LIF or  $E_2$  following oil injection into the uterine lumen. Ovariectomized wild-type mice were hormonally primed with  $E_2$  and  $P_4$  and then injected with either 5  $\mu$ g of LIF or 40 ng of  $E_2$  3 days after  $P_4$ . Twelve hours later 50  $\mu$ l of paraffin oil was injected intraluminally, and the uteri were removed and weighed 48 h later. These results are presented in Fig. 5 and show that LIF injection was equally effective as  $E_2$  at inducing decidual-



**TABLE 2.** Rescue of pregnant LIF<sup>-/-</sup> by ip injection of LIF

| Day of LIF injection<br>( $\mu\text{g}/\text{mouse} \times \text{injections}$ ) | Nos. mice<br>injected | Nos.<br>pregnant | Nos. offspring<br>born (mean) |
|---------------------------------------------------------------------------------|-----------------------|------------------|-------------------------------|
| D4 (5 $\times$ 2)                                                               | 25                    | 10               | 28 (3)                        |
| D4 (2 $\times$ 3)                                                               | 5                     | 3                | 6 (2)                         |
| D5 (10 $\times$ 1)                                                              | 8                     | 2                | 7 (3)                         |

ization with no statistically significant difference between LIF and E<sub>2</sub> in the level to which decidualization was induced.

#### *Restoration of implantation and embryo development in LIF-deficient mice*

Previously we had attempted to rescue the failure of blastocyst implantation in LIF-deficient mice by the administration of recombinant LIF to pregnant LIF-deficient females using miniosmotic pumps inserted into the peritoneal cavity (14). Although implantation was induced in a few of the females, all the implanted embryos had died by day 9 of pregnancy. Death may have been due to a requirement for LIF to sustain postimplantation development, as LIF is expressed at low levels in the uterus throughout pregnancy and the LIF receptor is highly expressed in the placenta (15, 27). Alternatively, embryonic failure may have been due to traumatic effects on their development due to the pump being placed in the peritoneum. We repeated these experiments, with LIF being administered by ip injection. LIF-deficient females were caged with LIF-deficient males and checked daily for copulation plugs. On the fourth or fifth day of pregnancy, mated females were given a single ip injection of recombinant LIF at various doses. Approximately half of the females became pregnant and delivered viable offspring 15–16 days later that continued their development to adulthood (Table 2). Southern analysis on their genotypes confirmed that all the offspring were homozygous for the mutated LIF allele (data not shown). These results demonstrated that administration of LIF to pregnant LIF deficient females restored embryo implantation, with the implanted embryos developing normally to term.

#### **Discussion**

Here we have further characterized the role of LIF in regulating embryo implantation in mice. Despite the relatively high levels of LIF expression in the uterus at ovulation, absence of LIF does not overtly affect preparation of the uterus for embryo implantation, as measured by a variety of parameters. Cell proliferation, gene expression and P<sub>4</sub> levels did not significantly differ from wild-type mice. Embryo development to the blastocyst stage was also normal with the blastocysts coming to lie at the antimesometrial end of the lumen, in tight contact with the luminal epithelium. There was, however, no evidence for the uterus in the LIF-deficient mice, even by day 7 of gestation, responding to the blastocyst by undergoing localized edema, apoptosis of the luminal epithelium or decidualization of the underlying stroma. Furthermore, it was apparent that the uterus in ovariectomized and appropriately hormonally primed, LIF-deficient mice was unresponsive to decidual inducing signals such as oil injection. Decidua formation, however, could be partially

induced using traumatic stimuli such as crushing of the P<sub>4</sub> primed uterus.

In rodents, implantation and decidualization are normally initiated by a nidatory surge in E<sub>2</sub> levels (12, 13). The transient rise of E<sub>2</sub> on the fourth day of pregnancy has pleiotropic effects, inducing a variety of transcription factors, growth factors, and changes in cell proliferation in the uterine stromal cells (28). Some of these factors may be essential to the implantation process. Among these is LIF, in which transcription is up-regulated in the glandular epithelium within 1 h of estrogen administration, with expression persisting for 5–6 h before declining to basal levels. By substituting LIF for nidatory E<sub>2</sub> in ovariectomized mice, we showed that it is an essential factor downstream to E<sub>2</sub> that probably functions by initiating changes in the uterine epithelium that result in blastocyst implantation and decidualization. Furthermore, ip injection of LIF into pregnant LIF-deficient females was sufficient to rescue embryo implantation failure, resulting in the LIF-deficient females giving birth to viable offspring. This revealed that during the mouse's life cycle, LIF is essential for initiating implantation but is not required for embryonic development or for the maintenance of pregnancy as has been previously suggested (29). However, it remains unclear what is the role of increased levels of LIF at ovulation. One possibility is that this is a consequence of the high levels of estrogen at ovulation inducing LIF, but the uterus is unresponsive to LIF in the absence of P<sub>4</sub>.

The ip doses of LIF required to induce implantation were relatively high. This may have been due to the rapid clearance of recombinant LIF from the circulation ( $t_{1/2} = 3\text{--}5$  min) and that injected LIF is accumulated at high levels, by the liver, pancreas, spleen and lungs, preventing access of sufficient biologically active LIF to the uterus (30). This was supported by the observation that much lower doses of LIF when directly injected into the uterine lumen were effective at inducing embryo implantation.

How LIF acts to induce implantation is still not understood. It is possible that it could act on the hypothalamic-pituitary axis where LIF can influence hormone synthesis and therefore may indirectly affect ovarian and/or uterine function (31). However, at present we favor a paracrine mechanism in that the target for LIF's action in the uterus is the luminal epithelium. The heterodimeric LIF receptor, consisting of the LIFR $\beta$  and the transmembrane protein gp130, are localized to the glandular and luminal epithelia (17, 32, 33). Neither component is expressed at detectable levels in stromal cells. Secreted LIF has also been detected in uterine washings (34, 35), and we have evidence that intact luminal epithelium isolated from the uterus responds to LIF by the activation of a variety of signal transduction pathways including the phosphorylation and nuclear translocation of STAT transcription factors (33). Blastocysts also express the heterodimeric LIF receptor (32). However, it is unlikely that blastocyst responsiveness to LIF at implantation is essential, as embryos homozygous for loss of either the LIF receptor  $\beta$  or gp130, both of which are required to form a functional receptor, can implant and undergo postimplantation development (36, 37). Furthermore, direct injection of LIF, at relatively low doses, into the uterine lumen is effective at inducing embryo implantation. Therefore, LIF, secreted from

the glandular epithelium in response to a rise in nidatory  $E_2$ , binds to receptors on the luminal epithelium and so activates signal transduction pathways that result in transcriptional changes in the epithelium. In turn, these result in a change in receptivity of the luminal epithelium allowing the blastocyst that is in apposition, to start to invade the epithelium and underlying stroma. The stroma responds to the invading blastocyst and now responsive epithelium by undergoing localized decidualization at the site of implantation. Once these changes have been initiated, LIF is no longer required by either the mother or the embryo for fetal development to term. Because ovulation, fertilization, and development to the blastocyst stage occur in LIF-deficient females, and implantation is rescued by the injection of LIF, this demonstrates that preimplantation development of the embryo and preparation of the uterus up to blastocyst apposition with the luminal epithelium may also be independent of LIF.

Changes in uterine cell proliferation and gene expression are driven by the ovarian steroid hormones  $E_2$  and  $P_4$ . These hormones act either directly on cells or through locally produced cytokines/growth factors that act in an autocrine/paracrine manner. The steroidal regulation of many growth factors and cytokines has been well documented (38, 39). However, which factors are essential to mediating the changes in uterine physiology in response to  $E_2$  and  $P_4$  is only being established by the use of gene targeting experiments or the identification of spontaneous (14, 40–44). As an example, the evidence for the epidermal growth factor family (EGF) regulating uterine cell proliferation in response to  $E_2$  has been compelling (7, 45–48). It is nevertheless evident that there is substantial redundancy within this family of growth factors regarding their roles in regulating cell proliferation and other changes in the uterus, as mice simultaneously deficient for three of the factors (EGF, TGF- $\alpha$  and amphiregulin) are fertile (49).

In conclusion, transient expression of LIF in the uterus, induced by the nidatory rise in  $E_2$  levels, at the time of embryo implantation, is essential to inducing a state of receptivity in the uterine epithelium, allowing both blastocyst invasion and stromal decidualization. LIF is neither required for both pre- and postimplantation embryogenesis nor for the maintenance of pregnancy. Current investigations are focused on determining what factors are regulated in the luminal epithelium by the action of LIF on this tissue. Identification of these factors should provide deeper insights into how this complex, but vital process of implantation is regulated.

## Acknowledgments

We are very grateful to John Heath for supplying the LIF expression plasmid, Pat Clark for purifying LIF protein, Susan Abbondanzo and Emily Cullinan for help and Anne Vernallis for the bioassays. We would also like to thank Jeff Pollard, Paul Cohen, and Diana Escalante for advice and fruitful discussions.

## References

1. Finn CA 1980 Species variation in implantation. *Prog Reprod Biol* 7:253–261
2. Finn CA, Martin L 1969 Hormone secretion during early pregnancy in the mouse. *J Endocrinol* 45:57–65
3. Martin L, Finn CA, Carter J 1970 Effects of progesterone and oestradiol-17 $\beta$  on the luminal epithelium of the mouse uterus. *J Reprod Fertil* 21:461–469

4. Martin L, Finn CA, Trinder G, Martin L, Finn CA, Trinder G 1973 DNA synthesis in the endometrium of progesterone-treated mice. Hypertrophy and hyperplasia in the mouse uterus after oestrogen treatment: an autoradiographic study. *J Endocrinol* 56:303–307
5. Martin L, Finn CA, Trinder G 1973 Hypertrophy and hyperplasia in the mouse uterus after oestrogen treatment: an autoradiographic study. *J Endocrinol* 56:133–144
6. Ignar-Trowbridge DM, Nelson KG, Bidwell MC, Curtis SW, Washburn TF, McLachlan JA, Korach KS 1992 Coupling of dual signaling pathways: epidermal growth factor action involves the estrogen receptor. *Proc Natl Acad Sci USA* 89:4658–4662
7. Curtis SW, Washburn T, Sewall C, DiAugustine R, Lindzey J, Couse JF, Korach KS 1996 Physiological coupling of growth factor and steroid receptor signaling pathways: estrogen receptor knockout mice lack estrogen-like response to epidermal growth factor. *Proc Natl Acad Sci USA* 93:12626–12630
8. Adesanya OO, Zhou J, Samathanam C, Powell-Braxton L, Bondy CA 1999 Insulin-like growth factor 1 is required for G2 progression in the estradiol-induced mitotic cycle. *Proc Natl Acad Sci USA* 96:3287–3291
9. Hana V, Murphy LJ 1994 Interdependence of epidermal growth factor and insulin-like growth factor-I expression in the mouse uterus. *Endocrinology* 135:107–112
10. Psychoyos A 1986 Uterine receptivity for nidation. Hormonal control of uterine receptivity for nidation. *Ann NY Acad Sci* 476:36–42
11. Abrahamsohn PA, Zorn TM 1993 Implantation and decidualization in rodents. *J Exp Zool* 266:603–628
12. Finn CA, Martin L 1974 The control of implantation. *J Reprod Fertil* 39:195–206
13. McCormack JT, Greenwald GS 1974 Evidence for a preimplantation rise in oestradiol-17 $\beta$  levels on day 4 of pregnancy in the mouse. *J Reprod Fertil* 41:297–301
14. Stewart CL, Kaspar P, Brunet LJ, Bhatt H, Gadi I, Kontgen F, Abbondanzo SJ 1992 Blastocyst implantation depends on maternal expression of leukemia inhibitory factor [see comments]. *Nature* 359:76–79
15. Bhatt H, Brunet LJ, Stewart CL 1991 Uterine expression of leukemia inhibitory factor coincides with the onset of blastocyst implantation. *Proc Natl Acad Sci USA* 88:11408–11412
16. Shen MM, Leder P 1992 Leukemia inhibitory factor is expressed by the preimplantation uterus and selectively blocks primitive ectoderm formation *in vitro*. *Proc Natl Acad Sci USA* 89:8240–8244
17. Cullinan EB, Abbondanzo SJ, Anderson PS, Pollard JW, Lessey BA, Stewart CL 1996 Leukemia inhibitory factor (LIF) and LIF receptor expression in human endometrium suggests a potential autocrine/paracrine function in regulating embryo implantation. *Proc Natl Acad Sci USA* 93:3115–3120
18. Hirzel DJ, Wang J, Das SK, Dey SK, Mead RA 1999 Changes in uterine expression of leukemia inhibitory factor during pregnancy in the Western spotted skunk. *Biol Reprod* 60:484–492
19. Vogiagis D, Salamonsen LA 1999 Review: the role of leukaemia inhibitory factor in the establishment of pregnancy. *J Endocrinol* 160:181–190
20. Summers MC, Bhatnagar PR, Lawitts JA, Biggers JD 1995 Fertilization *in vitro* of mouse ova from inbred and outbred strains: complete preimplantation embryo development in glucose-supplemented KSOM. *Biol Reprod* 53:431–437
21. Robinson RC, Grey LM, Staunton D, Vankelecom H, Vernallis AB, Moreau JF, Stuart DJ, Heath JK, Jones EY 1994 The crystal structure and biological function of leukemia inhibitory factor: implications for receptor binding. *Cell* 77:1101–1116
22. Vernallis AB, Hudson KR, Heath JK 1997 An antagonist for the leukemia inhibitory factor receptor inhibits leukemia inhibitory factor, cardiotrophin-1, ciliary neurotrophic factor, and oncostatin M. *J Biol Chem* 272:26947–26952
23. Merchant-Larios H, Mendlovic F, Alvarez-Buylla A 1985 Characterization of alkaline phosphatase from primordial germ cells and ontogenesis of this enzyme in the mouse. *Differentiation* 29:145–151
24. McMaster MT, Teng CT, Dey SK, Andrews GK 1992 Lactoferrin in the mouse uterus: analyses of the preimplantation period and regulation by ovarian steroids. *Mol Endocrinol* 6:101–111
25. Surveyor GA, Gendler SJ, Pemberton L, Das SK, Chakraborty I, Julian J, Pimental RA, Wegner CC, Dey SK, Carson DD 1995 Expression and steroid hormonal control of Muc-1 in the mouse uterus. *Endocrinology* 136:3639–3647
26. Finn CA 1965 Oestrogen and the decidual cell reaction of implantation in mice. *J Endocrinol* 32:223–226
27. Hilton DJ, Nicola NA, Metcalf D 1992 Distribution and binding properties of receptors for leukaemia inhibitory factor. *Ciba Found Symp* 167:227–239
28. Cross JC, Werb Z, Fisher SJ 1994 Implantation and the placenta: key pieces of the development puzzle. *Science* 266:1508–1518
29. Piccinini MP, Beloni L, Livi C, Maggi E, Scarselli G, Romagnani S 1998 Defective production of both leukemia inhibitory factor and type 2 T-helper cytokines by decidual T cells in unexplained recurrent abortions. *Nat Med* 4:1020–1024
30. Hilton DJ, Nicola NA, Waring PM, Metcalf D 1991 Clearance and fate of leukemia-inhibitory factor (LIF) after injection into mice. *J Cell Physiol* 148:430–439
31. Auernhammer CJ, Melmed S 2000 Leukemia-inhibitory factor-neuroimmune modulator of endocrine function [In Process Citation]. *Endocr Rev* 21:313–345

32. Nichols J, Davidson D, Taga T, Yoshida K, Chambers I, Smith A 1996 Complementary tissue-specific expression of LIF and LIF-receptor mRNAs in early mouse embryogenesis. *Mech Dev* 57:123–131
33. Deleted in proof
34. Anegón I, Cuturi MC, Godard A, Moreau M, Terqui M, Martinat-Butte F, Souillou JP 1994 Presence of leukaemia inhibitory factor and interleukin 6 in porcine uterine secretions prior to conceptus attachment. *Cytokine* 6:493–499
35. Laird SM, Tuckerman EM, Dalton CF, Dunphy BC, Li TC, Zhang X 1997 The production of leukaemia inhibitory factor by human endometrium: presence in uterine flushings and production by cells in culture. *Hum Reprod* 12:569–574
36. Ware CB, Horowitz MC, Renshaw BR, Hunt JS, Liggitt D, Koblar SA, Gliniak BC, McKenna HJ, Papayannopoulou T, Thoma B, Cheng L, Donovan PJ, Peschon JJ, Bartlett PF, Willis CR, Wright BD, Carpenter MK, Davison BL, Gearing DP 1995 Targeted disruption of the low-affinity leukemia inhibitory factor receptor gene causes placental, skeletal, neural and metabolic defects and results in perinatal death. *Development* 121:1283–1299
37. Yoshida K, Taga T, Saito M, Suematsu S, Kumanogoh A, Tanaka T, Fujiwara H, Hirata M, Yamagami T, Nakahata T, Hirabayashi T, Yoneda Y, Tanaka K, Wang WZ, Mori C, Shiota K, Yoshida N, Kishimoto T 1996 Targeted disruption of gp130, a common signal transducer for the interleukin 6 family of cytokines, leads to myocardial and hematological disorders. *Proc Natl Acad Sci USA* 93:407–411
38. Stewart CL, Cullinan EB 1997 Preimplantation development of the mammalian embryo and its regulation by growth factors. *Dev Genet* 21:91–101
39. Pollard JW 1991 Lymphohematopoietic cytokines in the female reproductive tract. *Curr Opin Immunol* 3:772–777
40. Abbondanzo SJ, Cullinan EB, McIntyre K, Labow MA, Stewart CL 1996 Reproduction in mice lacking a functional type 1 IL-1 receptor. *Endocrinology* 137:3598–3601
41. Lubahn DB, Moyer JS, Golding TS, Couse JF, Korach KS, Smithies O 1993 Alteration of reproductive function but not prenatal sexual development after insertional disruption of the mouse estrogen receptor gene. *Proc Natl Acad Sci USA* 90:11162–11166
42. Lydon JP, DeMayo FJ, Funk CR, Mani SK, Hughes AR, Montgomery Jr CA, Shyamala G, Conneely OM, O'Malley BW 1995 Mice lacking progesterone receptor exhibit pleiotropic reproductive abnormalities. *Genes Dev* 9:2266–2278
43. Pollard JW, Hunt JS, Wiktor-Jedrzejczak W, Stanley ER 1991 A pregnancy defect in the osteopetrotic (op/op) mouse demonstrates the requirement for CSF-1 in female fertility. *Dev Biol* 148:273–283
44. Zhu LJ, Bagchi MK, Bagchi IC 1998 Attenuation of calcitonin gene expression in pregnant rat uterus leads to a block in embryonic implantation. *Endocrinology* 139:330–339
45. Nelson KG, Takahashi T, Bossert NL, Walmer DK, McLachlan JA 1991 Epidermal growth factor replaces estrogen in the stimulation of female genital-tract growth and differentiation. *Proc Natl Acad Sci USA* 88:21–25
46. Nelson KG, Takahashi T, Lee DC, Luetteke NC, Bossert NL, Ross K, Eitzman BE, McLachlan JA 1992 Transforming growth factor- $\alpha$  is a potential mediator of estrogen action in the mouse uterus. *Endocrinology* 131:1657–1664
47. Das SK, Wang XN, Paria BC, Damm D, Abraham JA, Klagsbrun M, Andrews GK, Dey SK 1994 Heparin-binding EGF-like growth factor gene is induced in the mouse uterus temporally by the blastocyst solely at the site of its apposition: a possible ligand for interaction with blastocyst EGF-receptor in implantation. *Development* 120:1071–1083
48. Das SK, Chakraborty I, Paria BC, Wang XN, Plowman G, Dey SK 1995 Amphiregulin is an implantation-specific and progesterone-regulated gene in the mouse uterus. *Mol Endocrinol* 9:691–705
49. Luetteke NC, Qiu TH, Fenton SE, Troyer KL, Riedel RF, Chang A, Lee DC 1999 Targeted inactivation of the EGF and amphiregulin genes reveals distinct roles for EGF receptor ligands in mouse mammary gland development. *Development* 126:2739–2750
